# Supplementary material for: Late Repression of NF-κB Activity by Invasive but Not Non-Invasive Meningococcal Isolates Is Required to Display Apoptosis of Epithelial Cells
Source: PubMed Central journal article supplement (PMC3228807; doi:10.1371/journal.ppat.1002403), 2011-12-01
Supplement: ppat.1002403.s008.pdf [file ppat.1002403.s008.pdf]

**Supporting Table S2:** Characteristics of invasive ST-11 and carriage isolates of *N. meningitidis* used in this study.

|                       | Isolate  | Clonal Complex                 | Phenotype                                 | Isolation Site |
|-----------------------|----------|--------------------------------|-------------------------------------------|----------------|
| <b>Invasive</b>       | LNP13143 | ST-11                          | W135: 2a: P1.5, 2                         | CSF            |
|                       | LNP17592 | ST-11                          | W135:2a: P1.5, 2                          | Blood          |
|                       | LNP19008 | ST-11                          | C: 2a : P1.5, 2                           | Blood          |
|                       | LNP19995 | ST-11                          | W135: 2a: P1.5, 2                         | CSF            |
|                       | LNP20342 | ST-11                          | B: 2a: P1-5, 2                            | CSF            |
|                       | LNP20553 | ST-11                          | C: 2a: P1.5                               | CSF            |
|                       | LNP21515 | ST-11                          | C: 2a: P1.5                               | CSF            |
|                       | LNP21678 | ST-11                          | C: 2a: P1.5                               | Blood          |
|                       | LNP21996 | ST-11                          | B: 2a: P1. 5                              | Blood          |
|                       | LNP24198 | ST-11                          | C: 2a: P1.7,1                             | Blood          |
| <b>Carriage</b>       | LNP1026  | ST-162                         | B: NT: P1.4                               | Nasopharynx    |
|                       | LNP1046  | ST-254                         | C: NT: P1.4, 7                            | Nasopharynx    |
|                       | LNP1288  | ST-32                          | B: 14: P17. 16                            | Nasopharynx    |
|                       | LNP1934  | ST-32                          | B: 14: P17. 16                            | Nasopharynx    |
|                       | LNP3503  | ST-32                          | B: 14: P1. 7, 16                          | Nasopharynx    |
|                       | LNP10820 | ST-5                           | A: 4: P1.9                                | Expectoration  |
|                       | LNP16239 | NA <sup>(1)</sup><br>(ST-1117) | B: NT <sup>(2)</sup> : NST <sup>(3)</sup> | Expectoration  |
|                       | LNP18166 | ST-22                          | W135: NT: NST                             | Expectoration  |
|                       | LNP20642 | ST-334                         | C: NT: NST                                | Expectoration  |
|                       | LNP21019 | ST-35                          | B: NT:P1.14                               | Expectoration  |
| <b>Mutant strains</b> |          | <b>Characteristics</b>         |                                           |                |

Z0305 Isogenic mutant of the invasive isolate LNP19995, deficient in LOS production (*lpxA::aph3'*), Kan<sup>R</sup> [22]

NM0401 Isogenic mutant of the invasive isolate LNP19995, deficient in PorB expression (*porB::erm*), Ery<sup>R</sup> [22]

NM0701 Isogenic mutant of the invasive isolate LNP19995, deficient in LOS and PorB expression (*lpxA::aph3'*; *porB::erm*), Kan<sup>R</sup> Ery<sup>R</sup> [22]

AD1001 Isogenic mutant of the carriage isolate LNP21019, deficient in LOS production (*lpxA::aph3'*), Kan<sup>R</sup> [22]

LNP19995 Red Recombinant strain isogenic of LNP19995 expressing the DsRed fluorescent protein [22]

LNP21019 Red Recombinant strain isogenic of LNP21019 expressing the DsRed fluorescent protein [22]

(1) NA: not assigned to major clonal complex. The ST between parenthesis represents the sequence type. (2) NT: non-typeable. (3) NST: non-subtypeable. Kan<sup>R</sup>: Resistance in kanamycin. Ery<sup>R</sup>: resistance in erythromycin.
