# Supplementary material for: Late Repression of NF-κB Activity by Invasive but Not Non-Invasive Meningococcal Isolates Is Required to Display Apoptosis of Epithelial Cells
Source: PLoS Pathog. 2011 Dec 1;7(12):e1002403. doi: 10.1371/journal.ppat.1002403 (PMC3228807; doi:10.1371/journal.ppat.1002403)
Supplement: Table S1 — si RNA oligonucleiotides used in this study. (PDF) [file ppat.1002403.s007.pdf]

**Supporting Table S1: *si*RNA oligonucleotides used in this study**

| <b><i>si</i>RNA</b> | <b>Sequence</b>       | <b>Sequence origin and position<sup>1</sup></b> |
|---------------------|-----------------------|-------------------------------------------------|
| <i>si</i> TLR4-1    | GGUGUGAAAUCCAGACAAUTT | 260-280 (accession number AL160272)             |
| <i>si</i> TLR4-2    | CGAUGAUUAUUAUGACUUATT | 992-1010 (accession number AL160272)            |
| <i>si</i> CTRL      | UUCUCCGAACGUGUCACGUTT | This study                                      |

1: All positions are from start codon
